# Supplementary material
Source: publisher figshare collection journal article supplement (https://tandf.figshare.com/ndownloader/files/15616130)
Supplement: Supplementary file 1 [file 15616130]

## Sheet: default
row ID	Standardized	logBCF	CAS
1	Fc1ccc(c(C(NOCC2CC2)=NC(=O)Cc2ccccc2)c1F)C(F)(F)F	2.72	180409-60-3
2	NC(=O)C=C	0.09	79-06-1
3	Nc1c(Cl)c(Cl)nc(C(O)=O)c1Cl	-1.7	6607
4	Nc1nc(N)nc(NC2CC2)n1	0	66215-27-8
5	O(P(Oc1ccccc1)Oc1ccccc1)c1ccccc1	2.39	nd
6	O(c1ccc(cc1)-c1ccccc1)c1ccc(cc1)-c1ccccc1	3.14	28984-87-4
7	O1c2ccccc2Oc2ccccc12	3.85	262-12-4
8	O=C1c2ccccc2C(=O)c2ccccc12	2	84-65-1
9	O=c1ccc2ccccc2o1	1.31	91-64-5
10	OC(=O)C(F)(F)C(F)(F)C(F)(F)C(F)(F)C(F)(F)C(F)(F)C(F)(F)C(F)(F)F	3.4	375-95-1
11	OC(=O)C1(CC1)C(=O)Nc1ccc(Cl)cc1Cl	-0.4	113136-77-9
12	OC(=O)C=CC(O)=O	1	110-16-7
13	OC(=O)Cn1c2c(Cl)cccc2sc1=O	1.56	698836
14	OC(=O)c1c(Cl)ccc2cc(Cl)cnc12	-0.1	84087-01-4
15	OC(=O)c1ccc(Br)cc1	1.2	586-76-5
16	OC(=O)c1nc(Cl)ccc1Cl	0	1702-17-6
17	OC(c1ccc(Cl)cc1)(c1ccc(Cl)cc1)c1ccc(Cl)cc1	3.95	3010-80-8
18	CC(C)(C)c1ccccc1OP(=O)(Oc1ccccc1)Oc1ccccc1	3.03	56803-37-3
19	OCCN(CCO)c1nc(Nc2ccccc2)nc(Nc2ccc(C=Cc3ccc(Nc4nc(Nc5ccccc5)nc(n4)N(CCO)CCO)cc3S(O)(=O)=O)c(c2)S(O)(=O)=O)n1	0.84	4404-43-7
20	OCCO	-0.5	107-21-1
21	Oc1c(I)cc(cc1I)C#N	1.46	1689-83-4
22	Oc1cc(Cl)c(Cl)c(Cl)c1Cl	2.15	nd
23	Oc1ccc(O)cc1	1.57	123-31-9
24	Oc1ccc(c(c1)C(F)(F)F)[N+]([O-])=O	1.1	88-30-2
25	[O-][N+](=O)OCC(CO[N+]([O-])=O)O[N+]([O-])=O	0.97	55-63-0
26	[O-][N+](=O)c1ccc(cc1)[N+]([O-])=O	-0.4	nd
27	[O-][N+](=O)c1cccc(c1)[N+]([O-])=O	0.77	nd
28	c1cc2cccc3c4cccc5cccc(c(c1)c23)c45	2.38	198-55-0
29	c1cc2ccccc2o1	2.56	271-89-6
30	c1ccc(cc1)-c1cccc2ccccc12	3.51	605-02-7
31	c1ccc2c(c1)c1ccccc1c1ccccc21	2.41	217-59-4
32	c1ccc2c(c1)ccc1cc3c(ccc4ccccc34)cc21	2.8	53-70-3
33	CC(C)=CC1C(C(=O)OCc2coc(Cc3ccccc3)c2)C1(C)C	3.55	10453-86-8
34	CC(C)C(C(=O)OC(C#N)c1cccc(Oc2ccccc2)c1)c1ccc(OC(F)F)cc1	3.6	70124-77-5
35	CC(C)C1CCC(CC1)C(C)C	3.5	22907-72-8
36	CC(C)C1CCCC2CCCCC12	3.58	27193-29-9
37	CC(C)CC(C)=CC(C)C	3.29	126690-66-2
38	CC(C)CC1CC(C)CCC1C	3.37	219750-66-0
39	CC(C)CC1CCCCC1	3.3	1678-98-4
40	CC(C)CCCCCCCCCCO	2.73	27458-92-0
41	CC(C)CCCCCCCO	2.51	25339-17-7
42	CC(C)OC(C)(C)C	0.76	17348-59-3
43	CC(C)c1ccc(cc1)[N+]([O-])=O	2.18	1817-47-6
44	CC(CC(C)(C)C)=CC(C)(C)C	3.29	123-48-8
45	CC(CN1CC(C)OC(C)C1)Cc1ccc(cc1)C(C)(C)C	3.03	67564-91-4
46	CC(CN1CCCCC1)Cc1ccc(cc1)C(C)(C)C	2.2	67306-00-7
47	CC(CNC(=O)CCC1(C)C(CC(N)=O)C2N=C1C(C)=C1N=C(C=C3N=C(C(C)=C4C(CCC(N)=O)C(C)(CC(N)=O)C2(C)N4[Co+]C#N)C(C)(CC(N)=O)C3CCC(N)=O)C(C)(C)C1CCC(N)=O)OP(O)(=O)OC1C(CO)OC(C1O)n1cnc2cc(C)c(C)cc12	0.48	68-19-9
48	CC(COc1ccc(Oc2ccccc2)cc1)Oc1ccccn1	3.14	95737-68-1
49	Brc1ccc(Br)c(Br)c1Br	3.18	22311-25-7
50	CC(Oc1ccc(Cl)cc1C)C(O)=O	0.48	7085-19-0
51	CC(Oc1ccc(Oc2ncc(cc2Cl)C(F)(F)F)cc1)C(O)=O	0.94	95977-29-0
52	CC1(C)C(C=C(Cl)C(F)(F)F)C1C(=O)OC(C#N)c1cccc(Oc2ccccc2)c1	3.29	68085-85-8
53	CC1(C)CCC(=Cc2ccc(Cl)cc2)C1(O)Cn1cncn1	0.78	131983-72-7
54	CC12CCC3C(CCc4cc(O)ccc34)C1CCC2(O)C#C	2.9	57-63-6
55	CC1C(C)(C)c2cc3COCC(C)c3cc2C1(C)C	3.02	1222-05-5
56	CC1C=CC2CC1C2(C)C	2.61	1330-16-1
57	CC1CC(C)(C)CC=C1	2.87	933-12-0
58	CC1CC(C)(C)c2cc(C(C)=O)c(C)cc2C1(C)C	2.78	1506-02-1
59	CC1CC(C)CC(C)(C)C1	3.65	50876-32-9
60	CC1CC(C)CC(C)C1	3.34	1839-63-0
61	CC1CCC(C)c2ccccc12	3.12	4175-54-6
62	CCC(C)C1OC2(CC3CC(CC=C(C)C(OC4CC(OC)C(OC5CC(OC)C(O)C(C)O5)C(C)O4)C(C)C=CC=C4COC5C(O)C(C)=CC(C(=O)O3)C45O)O2)C=CC1C	1.75	65195-55-3
63	Brc1ccccc1Br	3.1	583-53-9
64	CCCC(=NOCC)C1C(=O)CC(CC(C)SCC)CC1=O	0.51	74051-80-2
65	CCCC(Cn1cncn1)c1ccc(Cl)cc1Cl	1.97	66246-88-6
66	CCCC1COC(Cn2cncn2)(O1)c1ccc(Cl)cc1Cl	2.06	60207-90-1
67	CCCCC(C)C(C)C	3.32	3074-71-3
68	CCCCC(C)CCCC(C)C	3.18	13150-81-7
69	CCCCC(CC)CCC=C	3.43	19780-74-6
70	CCCCCCC(CC)CC	3.32	17302-11-3
71	CCCCCCC1CCCCC1	3.29	4292-75-5
72	CCCCCCCC(C)C(C)(C)C	3.34	62338-09-4
73	CCCCCCCCC	3.15	111-84-2
74	CCCCCCCCC=C	3.22	872-05-9
75	CCCCCCCCCCC=C	3.4	112-41-4
76	CCCCCCCCCCCCCCCC(O)=O	2.85	57-10-3
77	CCCCCCCCCCCCCCCCO	3.04	36653-82-4
78	CCCCCCCCCCCCCCc1ccc(cc1)S(O)(=O)=O	0.52	47377-16-2
79	CCCCCCCCCCCCOS(O)(=O)=O	-0.03	151-21-3
80	CCCCCCCc1ccc(O)cc1	2.75	1987-50-4
81	CCCCCCO	-0.27	111-27-3
82	CCCCCCOC(=O)c1ccccc1C(=O)OCCCCCC	3.24	84-75-3
83	C1CC2CCCCC2C1	2.91	496-10-6
84	CCCCNC(=O)n1c(NC(=O)OC)nc2ccccc12	1.43	17804-35-2
85	CCCCO	-0.4	71-36-3
86	CCCCOCCO	-0.22	111-76-2
87	CCCN(CC)CC1COC2(CCC(CC2)C(C)(C)C)O1	1.9	118134-30-8
88	CCCOCC(=Nc1ccc(Cl)cc1C(F)(F)F)n1ccnc1	2.59	99387-89-0
89	CCCSP(=S)(OCC)Oc1ccc(Cl)cc1Cl	3.01	34643-46-4
90	CCNc1nc(Cl)nc(NC(C)(C)C)n1	0.85	5915-41-3
91	CCNc1nc(NC(C)(C)C)nc(SC)n1	1.95	886-50-0
92	CCNc1nc(NC(C)CC)nc(OC)n1	1.2	26259-45-0
93	CCNc1nc(NCC)nc(SC)n1	0.31	1014-70-6
94	CCOC(C)=O	1.48	141-78-6
95	CCOP(=S)(CC)Sc1ccccc1	1.89	944-22-9
96	CCOP(=S)(OCC)Oc1ccc(cc1)S(C)=O	1.68	115-90-2
97	CCOP(=S)(OCC)SCn1nnc2ccccc2c1=O	2.27	2642-71-9
98	CCOc1ccc(cc1)C(C)(C)COCc1cccc(Oc2ccccc2)c1	3.6	80844-07-1
99	CCc1ccccc1	1.19	100-41-4
100	CCc1cnc(C2=NC(=O)C(C)(N2)C(C)C)c(c1)C(O)=O	0.2	81335-77-5
101	CN(C)C1C2C(O)C3C(=C(O)C2(O)C(=O)C(C(N)=O)C1=O)C(=O)c1c(O)cccc1C3(C)O	-0.43	79-57-2
102	CN(C=Nc1ccc(C)cc1C)C=Nc1ccc(C)cc1C	3.26	33089-61-1
103	CNC(=O)ON=C(SC)C(=O)N(C)C	0.3	23135-22-0
104	CNC(=O)Oc1cccc(c1)N=CN(C)C	0	22259-30-9
105	COC(=O)c1ccccc1CS(=O)(=O)NC(=O)Nc1nc(OC)cc(OC)n1	0.2	83055-99-6
106	COC(=O)c1sccc1S(=O)(=O)NC(=O)Nc1nc(C)nc(OC)n1	-0.1	79277-27-3
107	COCc1cnc(C2=NC(=O)C(C)(N2)C(C)C)c(c1)C(O)=O	-1	114311-32-9
108	COP(=O)(OC)C(O)C(Cl)(Cl)Cl	0.4	52-68-6
109	COP(=O)(OC)OC(Br)C(Cl)(Cl)Br	0.93	300-76-5
110	COP(=O)(OC)Oc1ccccc1	2.76	10113-28-7
111	C1c2ccccc2Oc2ccccc12	3.62	92-83-1
112	COP(=S)(OC)SCn1nnc2ccccc2c1=O	1.54	86-50-0
113	C=CC#N	1.14	107-13-1
114	COc1c(Cl)c(Cl)c(Cl)c(Cl)c1OC	4.4	nd
115	COc1cc(Cl)c(Cl)c(Cl)c1OC	3.5	nd
116	COc1cc(Cl)cc(Cl)c1O	1.74	16766-31-7
117	COc1cc(Cl)ccc1Oc1ccc(Cl)cc1Cl	3.5	1000766
118	COc1nc(C)nc(NC(=O)NS(=O)(=O)c2ccccc2OCCCl)n1	0.11	82097-50-5
119	COc1ncc(F)c2nc(nn12)S(=O)(=O)Nc1c(F)cccc1F	0.18	145701-23-1
120	CSc1nc(NC(C)C)nc(NC(C)C)n1	1.93	7287-19-6
121	CSc1nnc(c(=O)n1N)C(C)(C)C	1.02	21087-64-9
122	Cc1[nH]c(=O)n(c(=O)c1Cl)C(C)(C)C	0.78	5902-51-2
123	Cc1c(Cl)c(Br)c(Br)c(Br)c1Br	3.98	39569-21-6
124	Cc1c(F)c(F)c(COC(=O)C2C(C=C(Cl)C(F)(F)F)C2(C)C)c(F)c1F	3.48	79538-32-2
125	Cc1c(cccc1[N+]([O-])=O)[N+]([O-])=O	1.34	nd
126	Cc1c2ccccc2c(C)c2c1ccc1ccccc21	2.91	57-97-6
127	Cc1cc(nc(Nc2ccccc2)n1)C1CC1	2.59	121552-61-2
128	Cc1cc2ccccc2cc1C	2.71	581-40-8
129	Cc1ccc(C)c(C)c1C	2.82	488-23-3
130	Cc1ccc(OP(=O)(Oc2ccc(C)cc2)Oc2ccc(C)cc2)cc1	3.07	78-32-0
131	Cc1ccc2c(CCCC2(C)C)c1	3.33	475-03-6
132	Cc1ccc2cc(C)c(C)cc2c1	3	829-26-5
133	Cc1ccc2cc3c(ccc4ccccc34)c3CCc1c23	3.17	56-49-5
134	Cc1ccc2cc3ccccc3cc2c1	2.41	613-12-7
135	Cc1ccc2ccc3cccc4ccc1c2c34	2.73	2381-21-7
136	Cc1ccc2ccccc2n1	0.48	91-63-4
137	Cc1cccc(OP(=O)(Oc2cccc(C)c2)Oc2cccc(C)c2)c1	2.31	563-04-2
138	Cc1cccc2c1ccc1ccccc21	3.18	832-69-9
139	Cc1ccccc1N	0.54	95-53-4
140	ClC(Cl)C(Cl)(Cl)Cl	1.81	76-01-7
141	ClC(Cl)C(c1ccc(Cl)cc1)c1ccc(Cl)cc1	4.48	72-54-8
142	ClC12C3C4(Cl)C5(Cl)C(Cl)(C1(Cl)C4(Cl)Cl)C2(Cl)C(Cl)(Cl)C35Cl	4.55	39801-14-4
143	ClC1=C(Cl)C(=O)c2ccccc2C1=O	4.04	117-80-6
144	ClC1=C(Cl)C2(Cl)C3COS(=O)OCC3C1(Cl)C2(Cl)Cl	1.39	115-29-7
145	ClC1=C(Cl)C2(Cl)C=CC1(Cl)C2(Cl)Cl	3.81	nd
146	ClC1C2(Cl)C=CC1(Cl)C(Cl)(Cl)C2(Cl)Cl	4.05	nd
147	CC(=O)OCC(=O)C1(O)CCC2C3CCC4=CC(=O)CCC4(C)C3C(=O)CC12C	1.3	50-04-4
148	Clc1c(Cl)c(Cl)c(c(Cl)c1Cl)-c1ccccc1	4.85	18259-05-7
149	Clc1cc(Cl)c(Cl)c(c1)-c1c(Cl)ccc(Cl)c1Cl	5.54	52744-13-5
150	Clc1cc(Cl)c(Cl)c(c1)-c1cc(Cl)c(Cl)cc1Cl	5.31	51908-16-8
151	Clc1cc(Cl)c(Cl)c(c1Cl)-c1ccccc1	4.71	33284-54-7
152	Clc1cc(Cl)c(c(Cl)c1)-c1c(Cl)cc(Cl)cc1Cl	3.36	33979-03-2
153	Clc1cc(Cl)c(c(Cl)c1)-c1c(Cl)cccc1Cl	4.81	56558-16-8
154	Clc1cc(Cl)c(c(Cl)c1)-c1ccc(Cl)c(Cl)c1	4.81	56558-17-9
155	Clc1cc(Cl)c(c(Cl)c1)-c1ccccc1	3.93	35693-92-6
156	Clc1cc(Cl)c(c(Cl)c1)-c1ccccc1Cl	3.88	62796-65-0
157	Clc1cc(Cl)c(cc1Cl)-c1c(Cl)ccc(Cl)c1Cl	5.08	38380-04-0
158	CC(=O)c1c(C)c(c(c(c1C)[N+]([O-])=O)C(C)(C)C)[N+]([O-])=O	3.09	81-14-1
159	Clc1cc(Cl)c2c(Cl)ccc(Cl)c2c1	4.4	31604-28-1
160	Clc1cc(Cl)c2cc(Cl)cc(Cl)c2c1	4.53	53555-64-9
161	Clc1cc(c(Cl)c(Cl)c1Cl)-c1ccccc1	4.39	33284-53-6
162	Clc1cc2Oc3ccccc3Oc2cc1Cl	2.88	29446-15-9
163	Clc1cc2c(oc3c(Cl)cccc23)c(Cl)c1Cl	3.11	62615-08-1
164	Clc1cc2ccccc2cc1Cl	4.04	2050-75-1
165	Clc1ccc(Cl)c(c1)-c1c(Cl)cc(Cl)cc1Cl	4.58	60145-21-3
166	Clc1ccc(Cl)c(c1)-c1c(Cl)ccc(Cl)c1Cl	4.78	38379-99-6
167	CC(C)(C)C(O)(CCc1ccc(Cl)cc1)Cn1cncn1	2	107534-96-3
168	Clc1ccc(Cl)c(c1)-c1cc(Cl)cc(Cl)c1	4.85	41464-42-0
169	Clc1ccc(Cl)c(c1)-c1cc(Cl)cc(Cl)c1Cl	5.27	52663-61-3
170	Clc1ccc(Oc2c(Cl)cc(Cl)cc2Cl)c(Cl)c1	3.95	104294-16-8
171	Clc1ccc(Oc2cc(Cl)c(Cl)cc2Cl)c(Cl)c1	4.21	60123-64-0
172	Clc1ccc(Oc2cc(Cl)c(Cl)cc2Cl)cc1	4.11	61328-45-8
173	Clc1ccc(Oc2cc(Cl)c(Cl)cc2Cl)cc1Cl	4.08	60123-65-1
174	Clc1ccc(Oc2ccc(Cl)c(Cl)c2)c(Cl)c1	4.24	61328-46-9
175	CC(C)(C)C(O)C(Cc1ccc(Cl)cc1)n1cncn1	1.91	76738-62-0
176	Clc1ccc(Oc2ccc(Cl)cc2Cl)c(Cl)c1	4.14	28076-73-5
177	Clc1ccc(Oc2ccc(Cl)cc2Cl)cc1	3.79	59039-21-3
178	Clc1ccc(c(Cl)c1)-c1c(Cl)cc(Cl)cc1Cl	3.72	39485-83-1
179	Clc1ccc(c(Cl)c1)-c1c(Cl)ccc(Cl)c1Cl	4.18	68194-05-8
180	Clc1ccc(c(Cl)c1)-c1cc(Cl)c(Cl)cc1Cl	4.86	38380-01-7
181	Clc1ccc(c(Cl)c1)-c1ccccc1	3.55	33284-50-3
182	Clc1ccc(c(Cl)c1)-c1ccccc1Cl	4.37	37680-66-3
183	Clc1ccc(c(Cl)c1Cl)-c1c(Cl)c(Cl)cc(Cl)c1Cl	5.26	52663-70-4
184	Clc1ccc(c(Cl)c1Cl)-c1c(Cl)ccc(Cl)c1Cl	4.88	38380-05-1
185	Clc1ccc(cc1)-c1c(Cl)ccc(Cl)c1Cl	5.19	52663-58-8
186	Clc1ccc(cc1)-c1c(Cl)cccc1Cl	5.08	38444-77-8
187	Clc1ccc(cc1)-c1cc(Cl)c(Cl)cc1Cl	4.6	32690-93-0
188	Clc1ccc(cc1)-c1ccc(Cl)c(Cl)c1	4.58	38444-90-5
189	Clc1ccc(cc1)-c1ccc(Cl)c(Cl)c1Cl	4.58	33025-41-1
190	Clc1ccc(cc1)-c1cccc(Cl)c1Cl	4.47	38444-85-8
191	Clc1ccc(cc1)-c1ccccc1Cl	3.69	34883-43-7
192	Clc1ccc(cc1Cl)-c1cc(Cl)c(Cl)c(Cl)c1Cl	5.88	38380-08-4
193	Clc1ccc2Oc3c(Cl)c(Cl)c(Cl)c(Cl)c3Oc2c1	3.21	39227-61-7
194	Clc1ccc2Oc3ccc(Cl)cc3Oc2c1	2.82	38964-22-6
195	Clc1ccc2c(c1)oc1c(Cl)cccc21	3.01	74918-40-4
196	Clc1ccc2c(c1)oc1cc(Cl)c(Cl)c(Cl)c21	3.41	83704-22-7
197	Clc1ccc2c(ccc3ccccc23)c1	3.63	24423-11-8
198	Clc1ccc2ccc(Cl)cc2c1	4.04	2198-77-8
199	Clc1ccc2ccccc2c1	3.63	nd
200	Clc1ccc2oc3ccc(Cl)cc3c2c1	3.66	5409-83-6
201	Clc1cccc(c1)-c1cccc(Cl)c1	2.63	2050-67-1
202	Clc1cccc(c1Cl)-c1c(Cl)ccc(Cl)c1Cl	5.15	52663-60-2
203	Clc1ccccc1-c1cc(Cl)c(Cl)cc1Cl	5	70362-47-9
204	CC(C)(C)OCCO	-0.22	7580-85-0
